# Supplementary material for: The Chlamydia pneumoniae effector SemD exploits its host’s endocytic machinery by structural and functional mimicry
Source: PubMed Central journal article supplement (PMC11344771; doi:10.1038/s41467-024-51681-3), 2024-08-24

## **Supplementary Information**

### **The *Chlamydia pneumoniae* effector SemD exploits its host's endocytic machinery by structural and functional mimicry**

Kocher et al.

#### **Supplementary Content**

|                                         |    |
|-----------------------------------------|----|
| Supplementary Figures.....              | 2  |
| Supplementary Tables.....               | 13 |
| Supplementary References .....          | 19 |
| Uncropped Scans of gels and blots ..... | 20 |

# Supplementary Figures

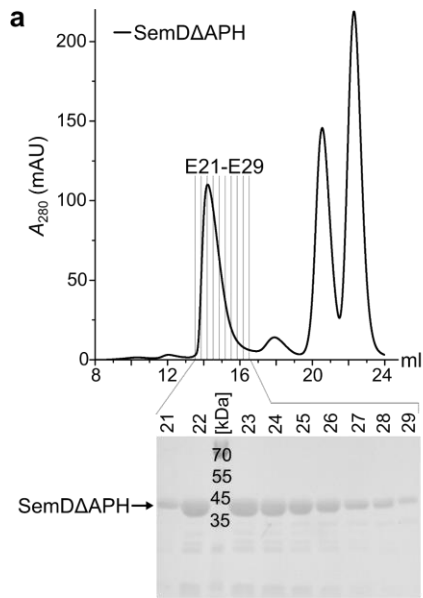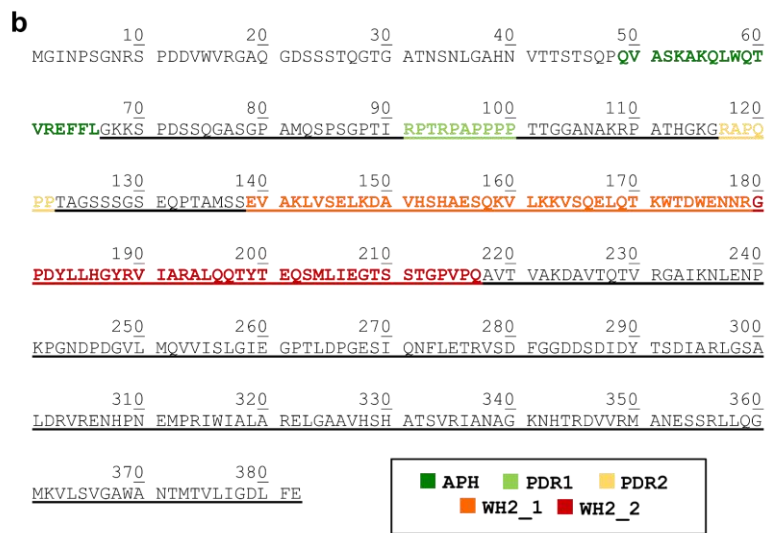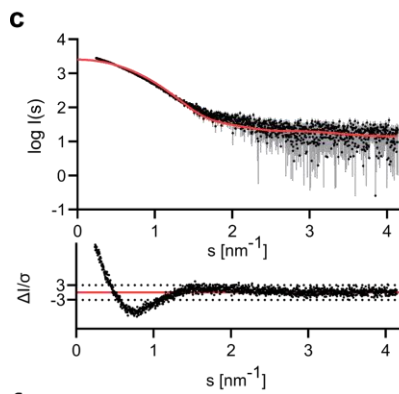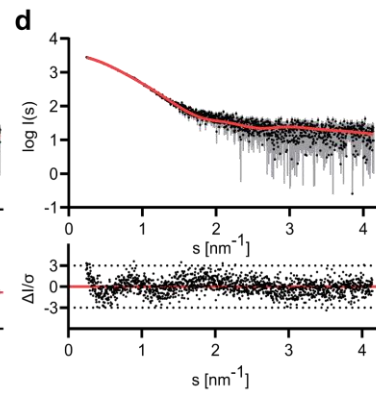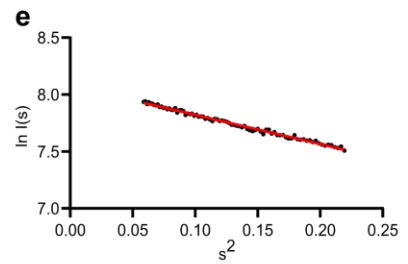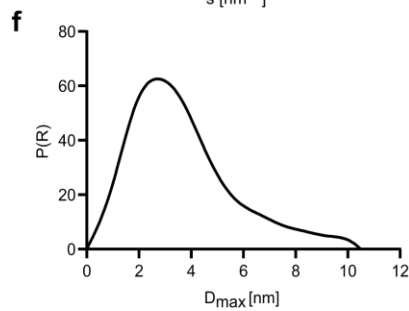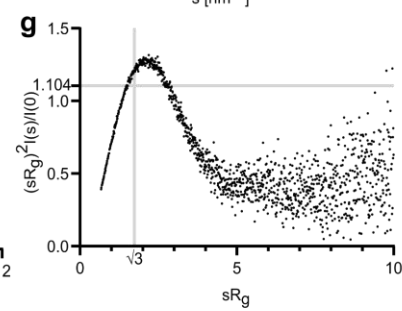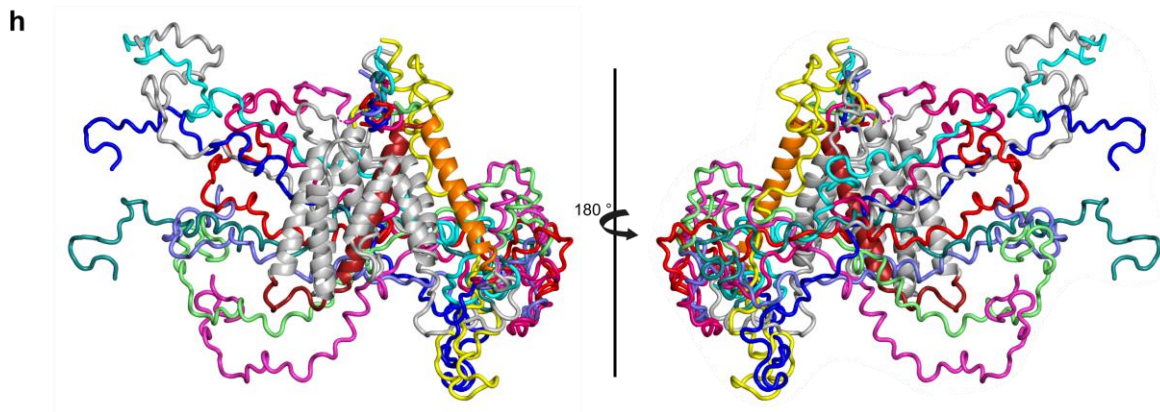

**Supplementary Figure 1 | SemDΔAPH purification and SAXS analysis.** **a** SEC of SemDΔAPH (*top*) in PBS, separated on a HiLoad 16/600 Superdex 200 pg column. From elution fractions 21-29, SDS samples were prepared and loaded on an SDS gel, stained with Coomassie brilliant blue (*bottom*). **b** Amino acid sequence of full length SemD (residues 1-382). The underlined fragment corresponds to SemDΔAPH (residues 67-382). Individual domains are marked: amphipathic helix (APH, darkgreen), proline-rich domains (PRD1: bright green, PRD2: yellow), WH2\_1 (orange) and WH2\_2 (red). **c** Theoretical scattering data of the SemDΔAPH crystal structure. Experimental data are shown in black dots, with grey error bars. The theoretical scattering fit ( $\chi^2$  value of 14.63) created with CRY SOL, is shown as red line and below is the residual plot of the data. **d** Scattering data of SemDΔAPH. Experimental data are shown in black dots, with grey error bars. The best CORAL model fit ( $\chi^2$  value of 1.197) is shown as red line and below is the residual plot of the data. **e** The Guinier plot of SemDΔAPH showed a stable Guinier region with a  $R_g$  of 2.78 nm. **f** The  $p(r)$  function of SemDΔAPH showed a globular molecule with an elongated part and a  $D_{max}$  value of 10.49 nm. **g** Dimensionless Kratky plot of SemDΔAPH showed an elongated particle. Source data for **c-g** are provided as Source Data file. **h** Overlay of ten independent CORAL models with a  $\chi^2$  value ranging from 1.197 – 2.098. The SemDΔAPH crystal structure shown in cartoon representation was used as template and the missing residues were modelled with CORAL and shown as loops. The grey model ( $\chi^2$  value of 1.197) is shown in detail in Fig. 1c.

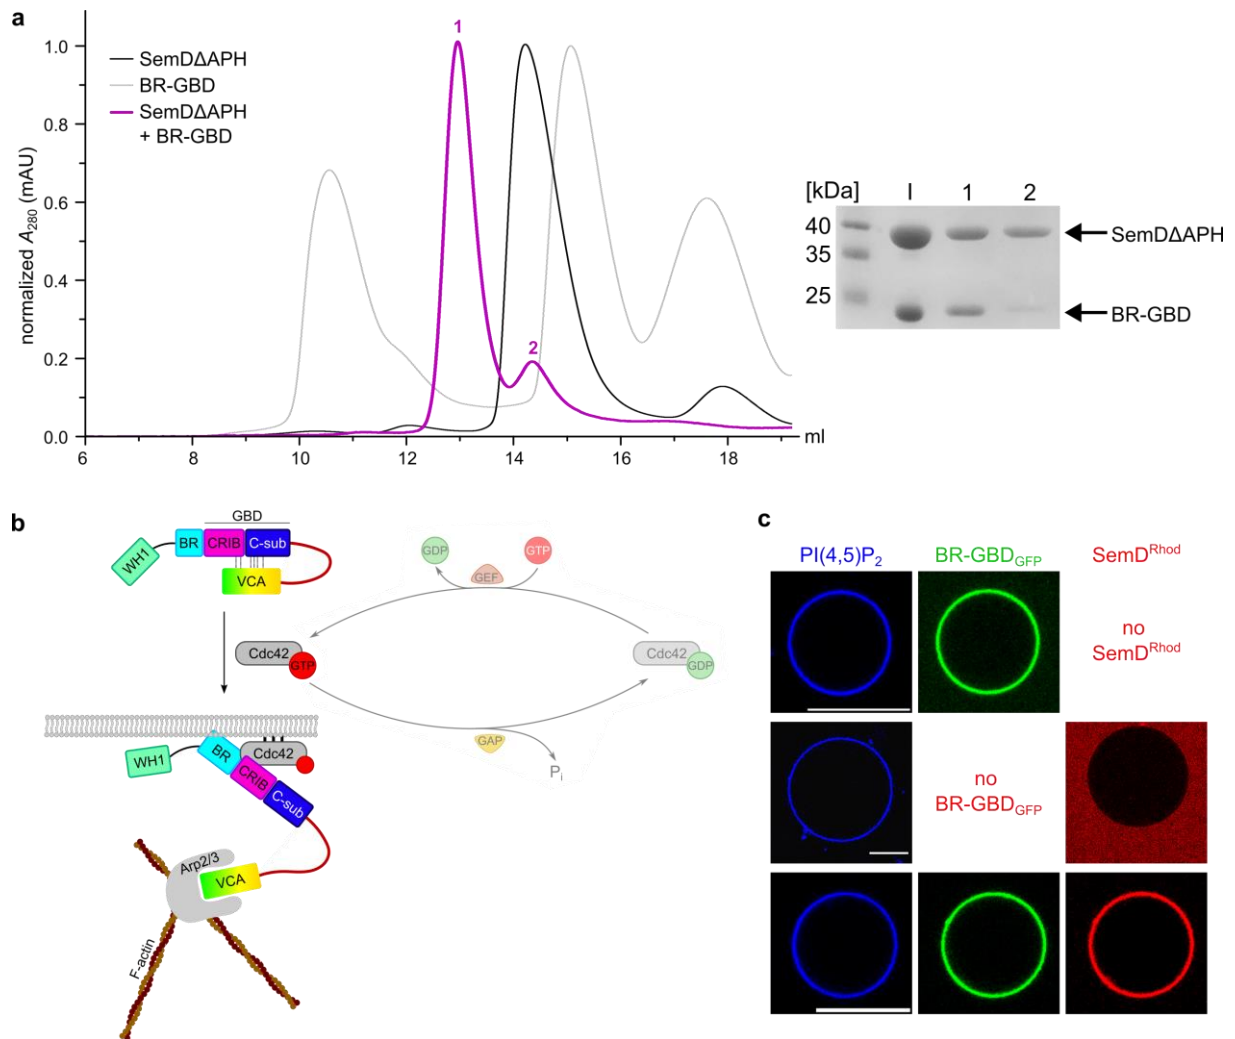

**Supplementary Figure 2 | Complex formation of SemD $\Delta$ APH and BR-GBD.**

**a** SEC (*left*) for SemD $\Delta$ APH (black), BR-GBD (grey) and SemD $\Delta$ APH + BR-GBD (magenta). Protein composition of peak 1 and 2 were analysed on an SDS gel (*right*), stained with Coomassie brilliant blue. The gel was loaded from left to right with the SEC-input sample (I), Peak 1 (1) and Peak 2 (2). **b** Schematic representation of N-WASP activation by Cdc42<sub>GTP</sub>. **c** Confocal images of PI(4,5)P<sub>2</sub>-GUVs with rhodamine-labelled SemD (SemD<sup>Rhod</sup>) and BR-GBD<sub>GFP</sub>. (Scale bars 10  $\mu$ m).

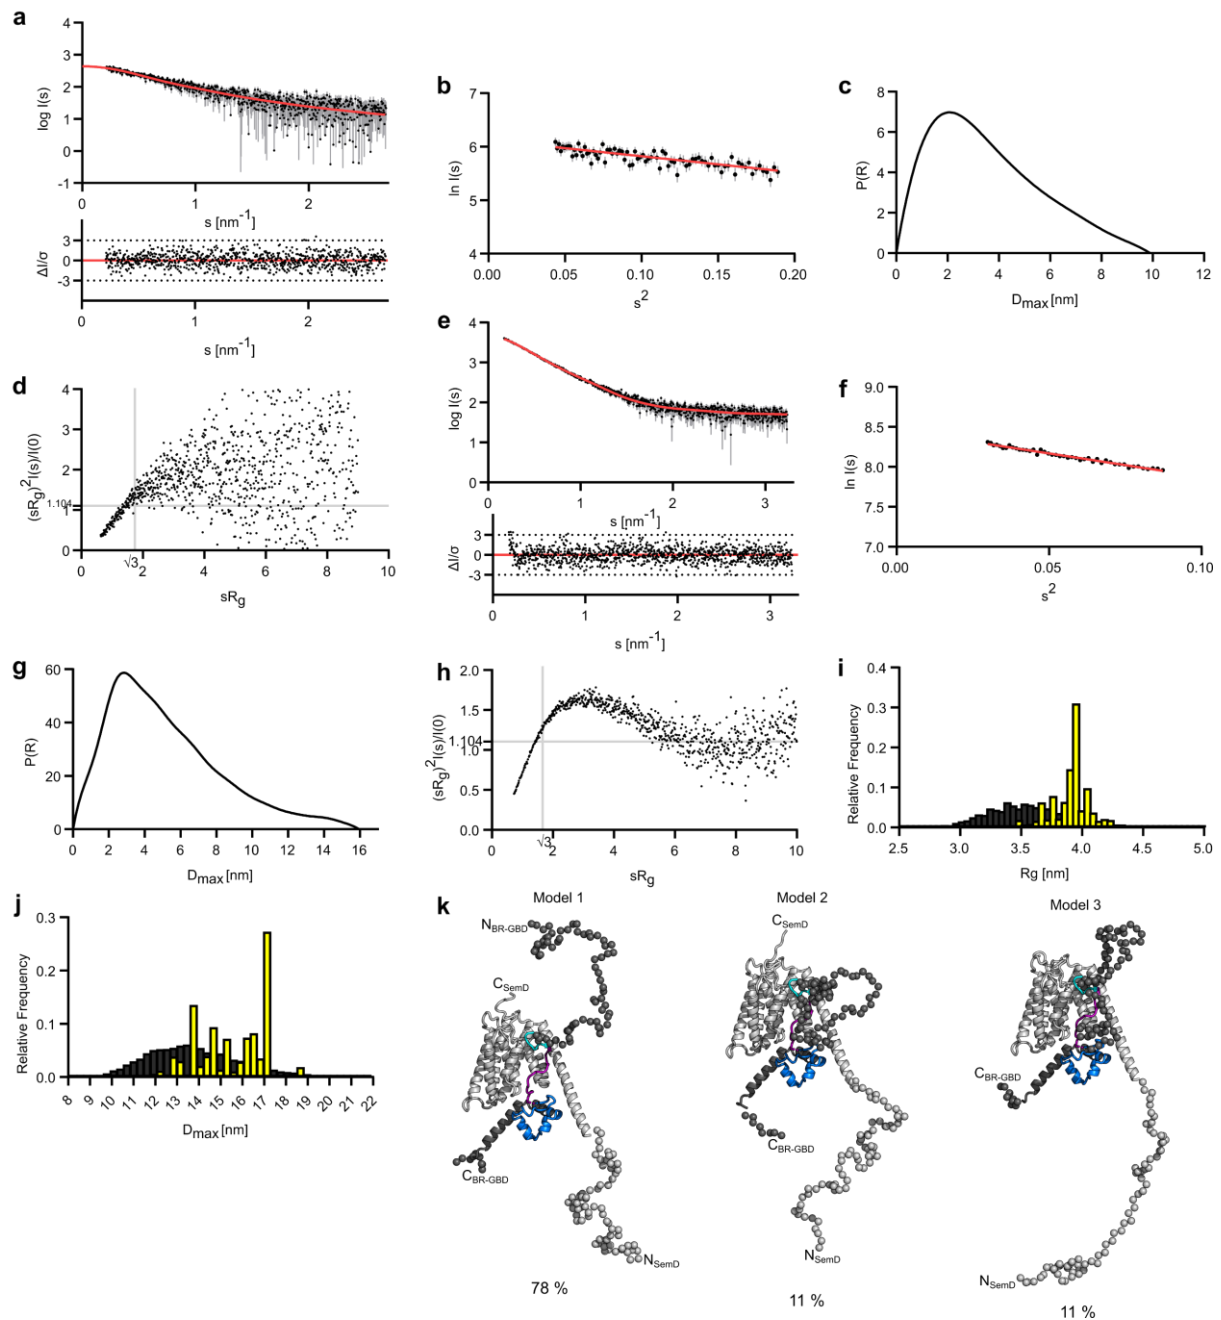

**Supplementary Figure 3 | Small-angle X-ray scattering data from BR-GBD alone and SemD $\Delta$ APH in complex with BR-GBD.** **a** Scattering data of BR-GBD. Experimental data are shown in black dots, with grey error bars. The GNOM fit is shown as red line and below is the residual plot of the data. **b** The Guinier plot of BR-GBD showed a stable Guinier region with a  $R_g$  of 3.01 nm. **c** The  $p(r)$  function of BR-GBD showed a globular molecule with an elongated part and a  $D_{max}$  value of 9.90 nm.

**d** The Dimensionless Kratky plot showed a high degree of flexibility for BR-GBD apo. **e** Scattering data of SemDΔAPH in complex with BR-GBD. Experimental data are shown in black dots, with grey error bars. The EOM ensemble model fit is shown as red line and below is the residual plot of the data. **f** The Guinier plot of SemDΔAPH in complex with BR-GBD showed a stable Guinier region with a  $R_g$  of 4.19 nm. **g** The  $p(r)$  function of SemDΔAPH in complex with BR-GBD showed an elongated particle with a  $D_{max}$  value of 15.94 nm. **h** The Dimensionless Kratky plot of SemDΔAPH in complex with BR-GBD showed an elongated particle with a high degree of flexibility. **i&j**  $R_g$  and  $D_{max}$  distribution of SemDΔAPH in complex with BR-GBD. Ensemble pool is shown in grey, selected EOM models are shown in yellow. The EOM analysis showed that the assembled complex (in blue) favoured a more extended conformation in comparison to the random pool (in grey). Source data for **a-j** are provided as Source Data File. **k** Selected EOM models from SemDΔAPH in complex with N-WASP. The used parts from the crystal structure of SemDΔAPH in complex with N-WASP are shown in cartoon representation and the missing termini parts in spheres. On the left site Model 1 with a volume fraction of 78 % is shown, in the middle and on the right are Model 2 and 3 with a volume fraction of 11 % each.

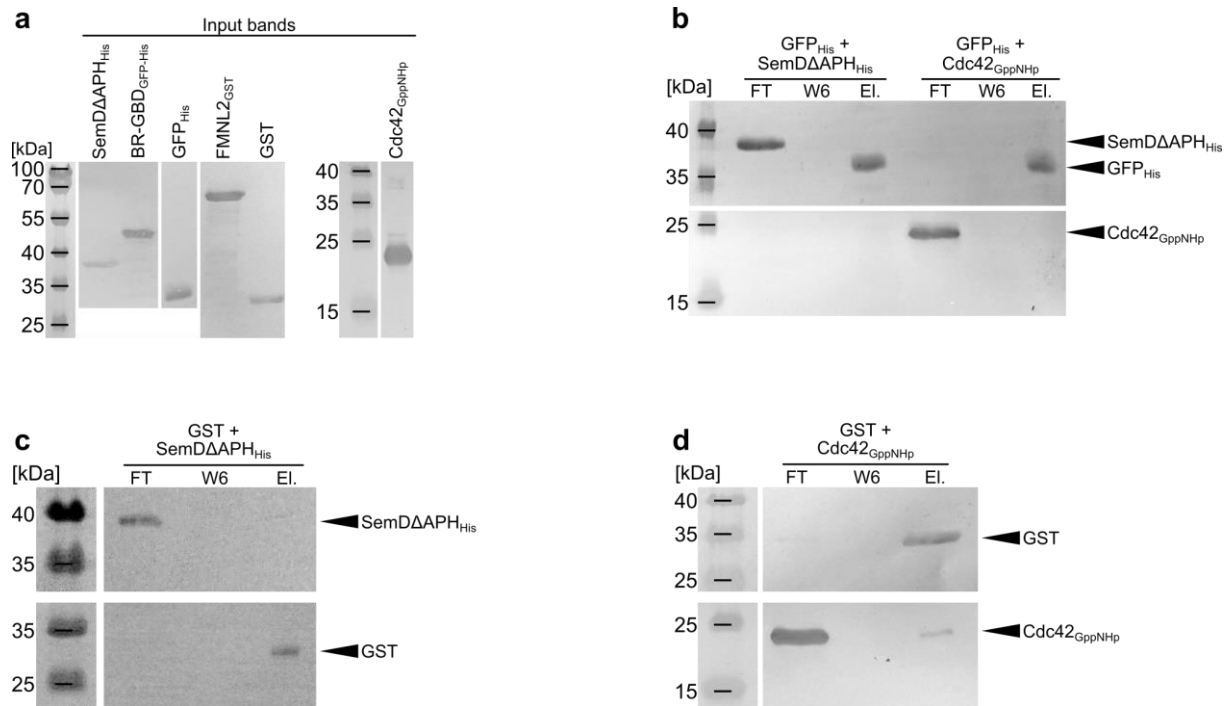

**Supplementary Figure 4 | Negative controls for pulldown assays from Figure 4.**

**a** Input bands for the recombinant and tagged proteins used for pulldown experiments from Fig. 4. **b** Negative control for GFP-Trap® pulldown experiments from Fig. 4a. SemDΔAPH<sub>His</sub> and Cdc42<sub>GppNHp</sub> were tested against GFP<sub>His</sub>. flow-through (FT), W6 and Elution (EI) were fractionated by SDS/PAGE and probed with anti-His for GFP<sub>His</sub> and SemDΔAPH<sub>His</sub> and anti-Cdc42 antibodies for Cdc42<sub>GppNHp</sub>. **c,d** Negative control for GST-pulldown from Fig. 4e. SemDΔAPH<sub>His</sub> and Cdc42<sub>GppNHp</sub> were tested against GST. flow-through (FT), W6 and Elution (EI) were fractionated by SDS/PAGE and probed with anti-GST for GST, anti-His for SemDΔAPH<sub>His</sub> and anti-Cdc42 antibodies for Cdc42<sub>GppNHp</sub>. Uncropped blots are provided as Source Data file.

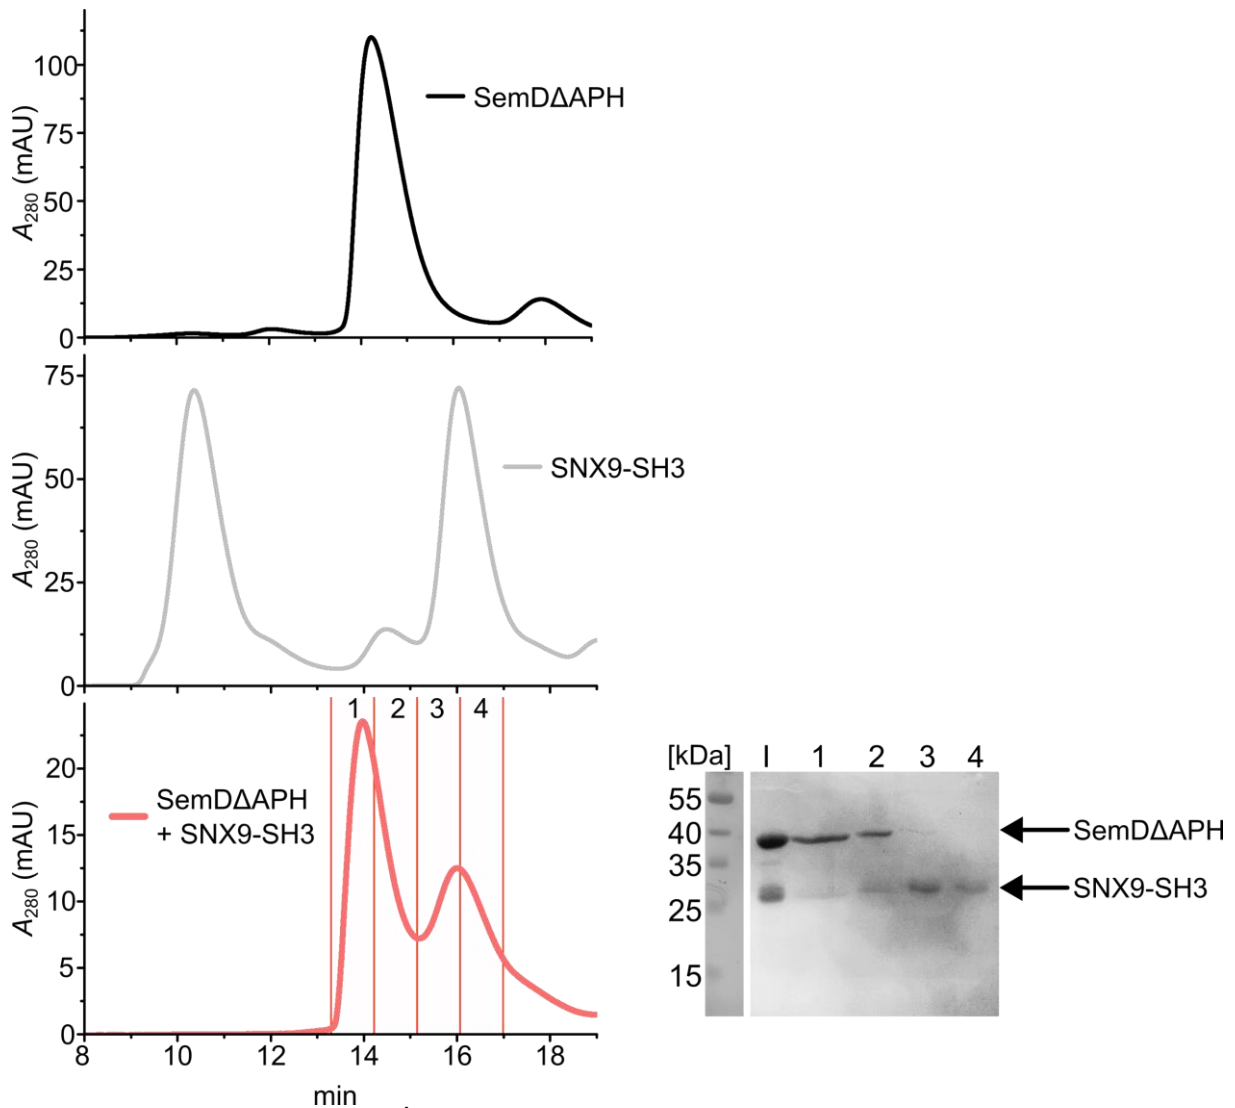

**Supplementary Figure 5 | Size exclusion data for SemD $\Delta$ APH and SNX9-SH3 complex purification.** SEC for SemD $\Delta$ APH (top, black), SNX9-SH3 (middle, grey) and SemD $\Delta$ APH + SNX9-SH3 (bottom, red). For the elution fractions 1 to 4, SDS samples were prepared and the protein composition was analysed on an SDS gel (right), stained with Coomassie brilliant blue. The gel was loaded from left to right with the SEC-input sample (I) and elutions 1-4.



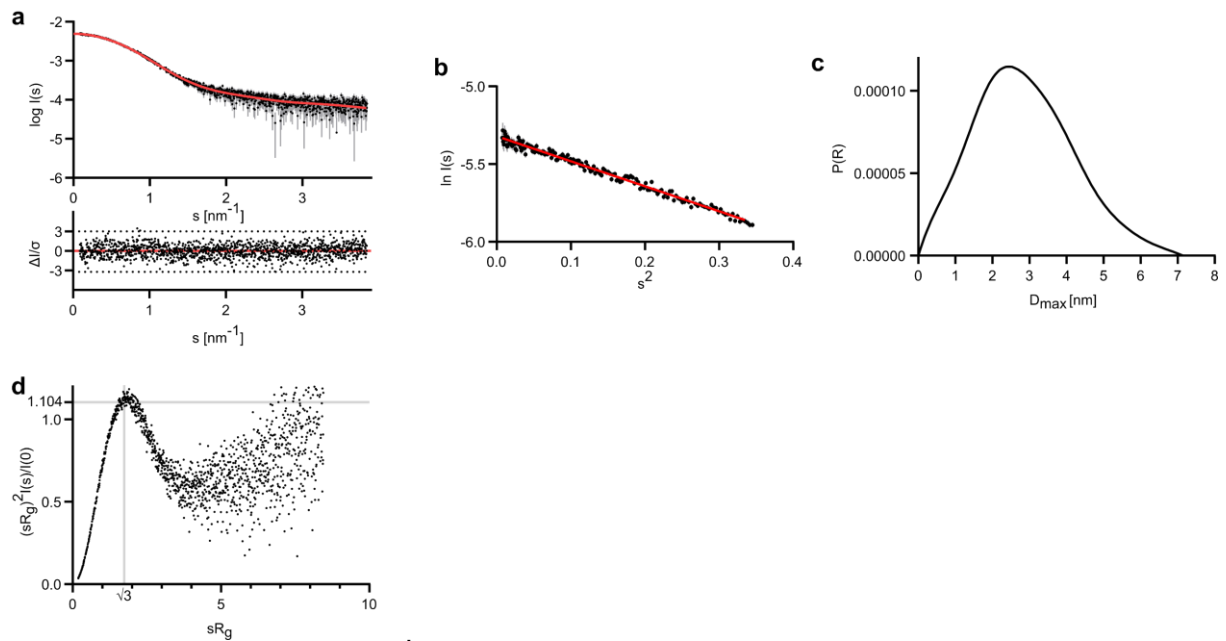

**Supplementary Figure 6 | Small-angle X-ray scattering data from SNX9-SH3 alone.** **a** Scattering data of SNX9-SH3 alone. Experimental data are shown in black dots, with grey error bars. The GNOM fit is shown as red line and below is the residual plot of the data. **b** The Guinier plot of SNX9-SH3 showed a stable Guinier region with a  $R_g$  of 2.20 nm. **c** The  $p(r)$  function of SNX9-SH3 apo showed a globular molecule with an elongated part and a  $D_{max}$  value of 7.14 nm. **d** The Dimensionless Kratky plot of SNX9-SH3 showed a compact globular molecule containing flexible parts. Source data for **a-d** are provided as Source Data file.

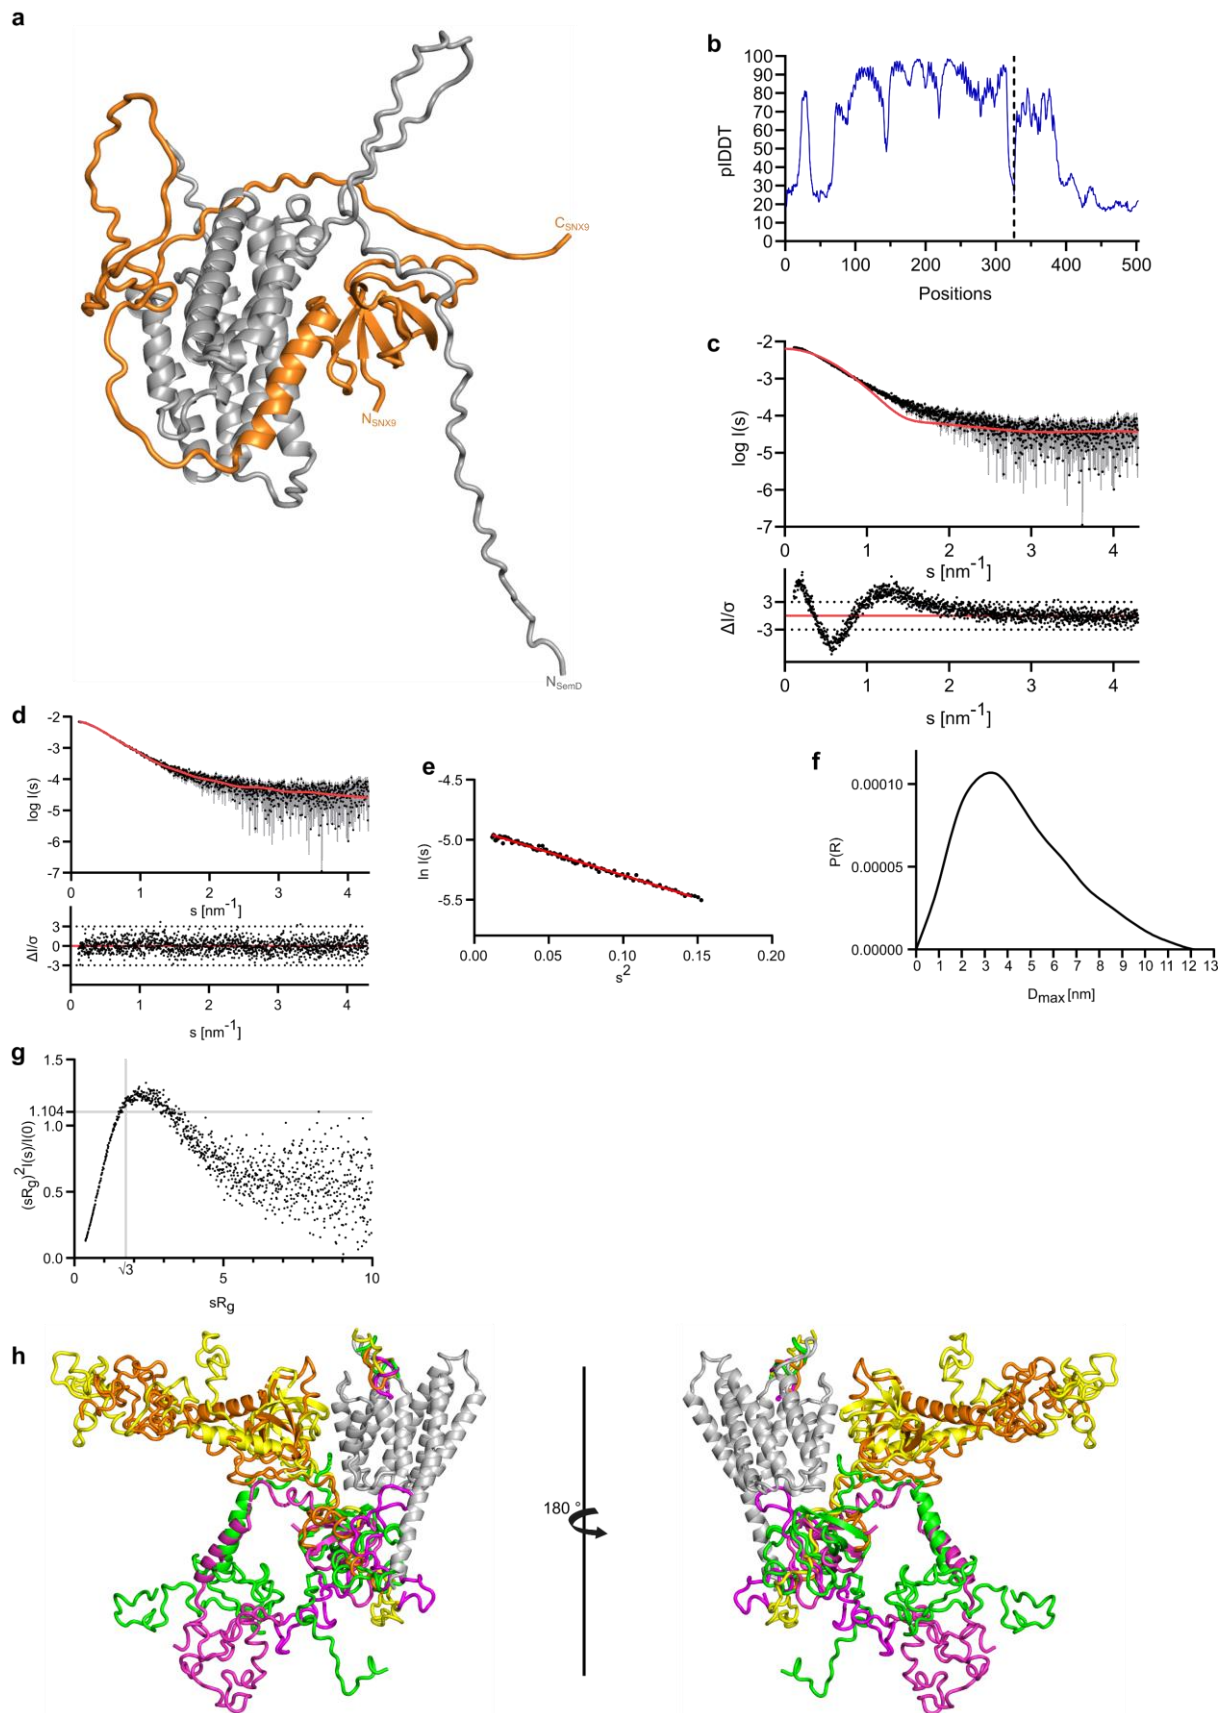

**Supplementary Figure 7 | Small-angle X-ray scattering data from SemD $\Delta$ APH in complex with SNX9-SH3.** **a** An AlphaFold2 prediction of SemD $\Delta$ APH (grey) in complex with SNX9-SH3 (orange). **b** pLDDT score from the AlphaFold2 prediction. The left part corresponds to SemD $\Delta$ APH and the right part to SNX9-SH3. **c** Theoretical scattering of the SemD $\Delta$ APH in complex with SNX9-SH3 from AlphaFold2 prediction. Experimental data are shown in black dots, with grey error bars. The theoretical scattering fit ( $\chi^2$  value of 8.49) created with CRY SOL, is shown as red line and below is the residual plot of the data. **d** The experimental Scattering data of SemD $\Delta$ APH in complex with SNX9-SH3 are shown in black dots, with grey error bars. The best CORAL model fit ( $\chi^2$  value of 1.018) is shown as red line and below is the residual plot of the data. **e** The Guinier plot of SemD $\Delta$ APH in complex with SNX9-SH3 showed a stable Guinier region with a  $R_g$  of 3.39 nm. **f** The  $p(r)$  function of SemD $\Delta$ APH in complex with SNX9-SH3 showed an elongated molecule and a  $D_{max}$  value of 12.16 nm. **g** The Dimensionless Kratky plot of SemD $\Delta$ APH in complex with SNX9-SH3 apo showed a compact globular molecule still containing flexible elements. Source data for **a-g** are provided as Source Data file. **h** Overlay of 4 independent CORAL models with a  $\chi^2$  value ranging from 1.018 – 1.092. The SemD $\Delta$ APH crystal structure (shown in grey) and the AlphaFold2 docking interface from SNX9-SH3 with the N-terminal part of SemD $\Delta$ APH, shown in cartoon representation were used as templates and the missing residues as well as the orientation were modelled with CORAL. The orange model ( $\chi^2$  value of 1.018) is shown in detail in Fig. 5d.

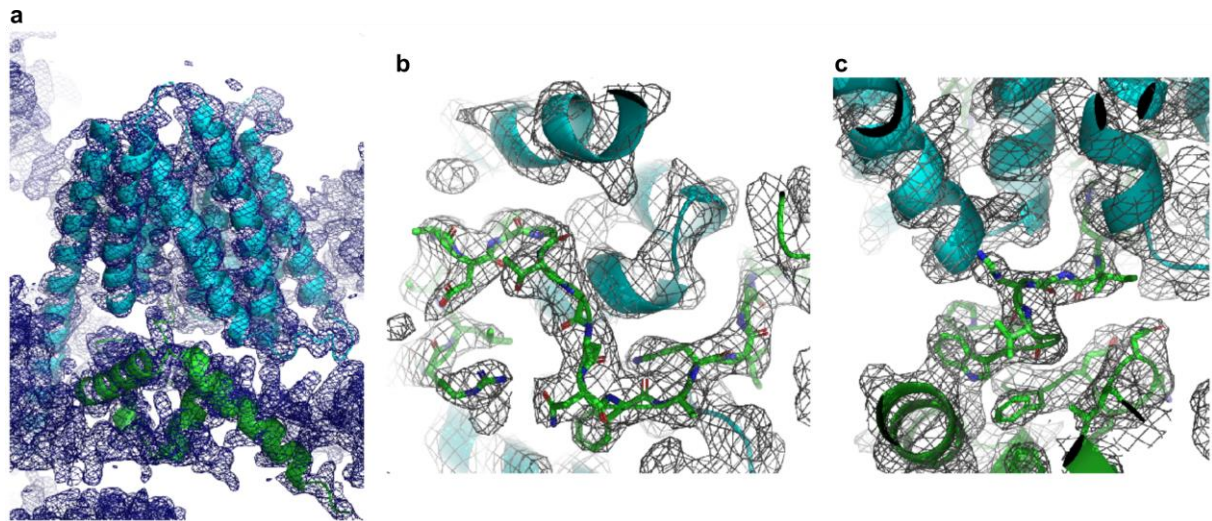

**Supplementary Figure 8 | Electron density of the SemD – BR-GBD interface. a**

Shown is the electron density of the overall structure of SemD (highlighted as blue cartoon) and BR-GBD (highlighted as green cartoon). **b,c** Zoom in on the interaction interface. For clarity reasons the SemD structure is shown as cartoon, whereas the BR-GBD protein is shown as sticks. The electron density (2F<sub>0</sub>-F<sub>c</sub>) is shown as grey mesh, contoured at 1.0 sigma. Although the structure is of medium resolution, the side chains of BR-GBD are clearly visible in the electron density.

## Supplementary Tables

**Supplementary Table 1.** Data collection and refinement statistics of the crystal structure of SemD $\Delta$ APH and SemD $\Delta$ APH - BR-GBD complex

|                                                      | SemD $\Delta$ APH             | SemD $\Delta$ APH + BR-GBD  |
|------------------------------------------------------|-------------------------------|-----------------------------|
| <b>Data collection</b>                               |                               |                             |
| Space group                                          | P1                            | P 31 2 1                    |
| Cell dimensions                                      |                               |                             |
| <i>a</i> , <i>b</i> , <i>c</i> (Å)                   | 46.99 51.95 58.62             | 120.22 120.22 65.24         |
| $\alpha$ , $\beta$ , $\gamma$ (°)                    | 88.33 105.89 117.43           | 90.0 90.0 120.0             |
| Resolution (Å)                                       | 45.82 - 2.1<br>(2.175 - 2.1)* | 52.06 - 3.3 (3.418 - 3.3) * |
| <i>R</i> <sub>sym</sub> or <i>R</i> <sub>merge</sub> | 0.07588 (0.5214)              | 0.1328 (0.8603)             |
| <i>I</i> / $\sigma$ <i>I</i>                         | 10.61 (2.56)                  | 17.63 (3.40)                |
| Completeness (%)                                     | 97.65 (97.52)                 | 99.66 (99.65)               |
| Redundancy                                           | 3.5 (3.6)                     | 20.7 (21.8)                 |
| <b>Refinement</b>                                    |                               |                             |
| Resolution (Å)                                       | 45.82 - 2.1<br>(2.175 - 2.1)* | 52.06 - 3.3 (3.418 - 3.3) * |
| No. reflections                                      | 26816 (2675)                  | 8408 (852)                  |
| <i>R</i> <sub>work</sub> / <i>R</i> <sub>free</sub>  | 0.2195 / 0.2745               | 0.2277 / 0.2439             |
| No. atoms                                            |                               |                             |
| Protein                                              | 3560                          | 2617                        |
| Ligand/ion                                           | 0                             | 0                           |
| Water                                                | 216                           | 0                           |
| B-factors                                            | (Ask for input)               |                             |
| Protein                                              | 38.76                         | 92.85                       |
| Ligand/ion                                           | -                             | -                           |
| Water                                                | 40.8                          | -                           |
| R.m.s. deviations                                    |                               |                             |
| Bond lengths (Å)                                     | 0.011                         | 0.012                       |
| Bond angles (°)                                      | 1.19                          | 1.68                        |

\*Data collection resulted in both dataset from a single crystal. \*Values in parentheses are for highest-resolution shell.

**Supplementary Table 2.** Overall SAXS Data of SemDΔAPH, BR-GBD, SNX9-SH3 and the corresponding complexes

| <b>Data collection parameters</b>        |                                                                                                                                      |                   |                          |                     |                            |
|------------------------------------------|--------------------------------------------------------------------------------------------------------------------------------------|-------------------|--------------------------|---------------------|----------------------------|
| SAXS Device                              | P12, PETRA III, DESY Hamburg <sup>1</sup>                                                                                            |                   |                          |                     |                            |
| Detector                                 | PILATUS 6 M (423.6 x 434.6 mm <sup>2</sup> )                                                                                         |                   |                          |                     |                            |
| Detector distance (m)                    | 3.0                                                                                                                                  |                   |                          |                     |                            |
| Beam size                                | 120 μm x 200 μm                                                                                                                      |                   |                          |                     |                            |
| Wavelength (nm)                          | 0.124                                                                                                                                |                   |                          |                     |                            |
| Sample environment                       | Quartz glass capillary, 1 mm ø                                                                                                       |                   |                          |                     |                            |
| Absolute scaling method                  | Comparison with scattering from pure H <sub>2</sub> O                                                                                |                   |                          |                     |                            |
| Normalization                            | To transmitted intensity by beam-stop counter                                                                                        |                   |                          |                     |                            |
| Scattering intensity scale               | Absolute scale or relative scale, cm <sup>-1</sup>                                                                                   |                   |                          |                     |                            |
| s range (nm <sup>-1</sup> ) <sup>‡</sup> | 0.03 – 7.0                                                                                                                           |                   |                          |                     |                            |
| <b>Sample</b>                            | <b>SemDΔAPH apo</b>                                                                                                                  | <b>BR-GBD apo</b> | <b>SemDΔAPH + BR-GBD</b> | <b>SNX9-SH3 apo</b> | <b>SemDΔAPH + SNX9 SH3</b> |
| Organism                                 | <i>Chlamydia pneumoniae</i> GiD <sup>2</sup>                                                                                         |                   |                          |                     |                            |
| UniProt ID (range)                       | Q9Z7M7 (67-382)                                                                                                                      | O08816 (142-273)  |                          | Q9Y5X1 (1-160)      |                            |
| Mode of measurement                      | Online SEC-SAXS                                                                                                                      |                   |                          |                     |                            |
| SEC-Column                               | Superdex200 increase 10/300 GL                                                                                                       |                   |                          |                     |                            |
| Flowrate (ml/min)                        | 0.6                                                                                                                                  |                   |                          |                     |                            |
| Injection volume (μl)                    | 100                                                                                                                                  |                   |                          |                     |                            |
| Temperature (°C)                         | 20                                                                                                                                   |                   |                          |                     |                            |
| Exposure time (# frames)                 | 0.995 s (2400)                                                                                                                       |                   |                          |                     |                            |
| # frames used for averaging              | 19                                                                                                                                   | 22                | 17                       | 46                  | 63                         |
| Protein buffer                           | PBS (137 mM NaCl, 2.7 mM KCl, 10 mM Na <sub>2</sub> HPO <sub>4</sub> , 1.8 mM KH <sub>2</sub> PO <sub>4</sub> ), pH 8.5, 3% Glycerol |                   |                          |                     |                            |
| Protein concentration (mg/ml)            | 8                                                                                                                                    | 10                | 8                        | 3.3                 | 3.3                        |

---

**Structural parameters**

---

*Guinier Analysis (PRIMUS)*

|                                                       |                |                |                 |                   |                  |
|-------------------------------------------------------|----------------|----------------|-----------------|-------------------|------------------|
| $I(0) \pm \sigma$ (cm <sup>-1</sup> )                 | 3224.17 ± 9.92 | 456.12 ± 13.03 | 4722.19 ± 35.06 | 0.0049 ± 0.000014 | 0.0073 ± 0.00002 |
| $R_g \pm \sigma$ (nm)                                 | 2.78 ± 0.01    | 3.01 ± 0.13    | 4.19 ± 0.04     | 2.20 ± 0.01       | 3.39 ± 0.02      |
| <i>s</i> -range (nm <sup>-1</sup> )                   | 0.243 – 0.468  | 0.209 – 0.432  | 0.173 – 0.295   | 0.087 – 0.579     | 0.110 – 0.382    |
| <i>min</i> < <i>sR<sub>g</sub></i> < <i>max limit</i> | 0.67 – 1.30    | 0.63 – 1.30    | 0.74 – 1.24     | 0.19 – 1.27       | 0.37 – 1.29      |
| Data point range                                      | 1 - 82         | 1 - 81         | 1 - 45          | 1 - 170           | 1 - 95           |
| Linear fit assessment (R <sup>2</sup> )               | 0.99           | 0.64           | 0.98            | 0.98              | 0.99             |

*PDDF/P(r) Analysis (GNOM)*

|                                       |                |               |                 |                   |                  |
|---------------------------------------|----------------|---------------|-----------------|-------------------|------------------|
| $I(0) \pm \sigma$ (cm <sup>-1</sup> ) | 3279.00 ± 9.82 | 434.70 ± 8.56 | 4667.00 ± 34.88 | 0.0049 ± 0.000012 | 0.0074 ± 0.00003 |
| $R_g \pm \sigma$ (nm)                 | 2.95 ± 0.01    | 2.91 ± 0.06   | 4.29 ± 0.05     | 2.23 ± 0.007      | 3.53 ± 0.02      |
| $D_{max}$ (nm)                        | 10.49          | 9.90          | 15.94           | 7.14              | 12.16            |
| Porod volume (nm <sup>3</sup> )       | 67.39          | 19.49         | 102.29          | 41.60             | 93.81            |
| <i>s</i> -range (nm <sup>-1</sup> )   | 0.243 – 4.142  | 0.212 – 2.682 | 0.173 – 3.236   | 0.087 – 3.845     | 0.110 – 4.30     |
| $\chi^2$ / CorMap P-value             | 0.925 / 0.081  | 1.013 / 0.579 | 1.070 / 0.234   | 0.972 / 0.076     | 0.977 / 0.759    |

---

**Molecular mass (kDa)**

---

|                                 |       |       |       |       |       |
|---------------------------------|-------|-------|-------|-------|-------|
| From $I(0)$                     | n.d.  | n.d.  | n.d.  | n.d.  | n.d.  |
| From Qp <sup>3</sup>            | 38.03 | 15.69 | 60.09 | 16.44 | 52.51 |
| From MoW <sup>24</sup>          | 37.53 | 18.91 | 48.24 | 16.79 | 46.93 |
| From Vc <sup>5</sup>            | 37.22 | 16.79 | 43.03 | 21.95 | 49.44 |
| Bayesian Inference <sup>6</sup> | 36.90 | 18.05 | 45.68 | 18.68 | 49.78 |
| From sequence                   | 35.13 | 19.74 | 54.87 | 18.80 | 53.90 |

---

| <b>Rigid body modeling</b>                |               |         |                                              |         |         |
|-------------------------------------------|---------------|---------|----------------------------------------------|---------|---------|
| CORAL                                     |               |         |                                              |         |         |
| Symmetry                                  | P1            |         | P1                                           |         |         |
| s-range for fit (nm <sup>-1</sup> )       | 0.243 – 4.142 |         | 0.110 – 4.30                                 |         |         |
| $\chi^2$ , CorMap <i>P</i> -value         | 1.197 / 0.005 |         | 1.018 / 0.507                                |         |         |
| EOM                                       |               |         |                                              |         |         |
| Symmetry                                  |               |         | P1                                           |         |         |
| s-range for fit (nm <sup>-1</sup> )       |               |         | 0.173 – 3.236                                |         |         |
| $\chi^2$ , CorMap <i>P</i> -value         |               |         | 1.107 / 0.033                                |         |         |
| <b>SASBDB accession codes<sup>7</sup></b> | SASDTQ5       | SASDTR5 | SASDTU5                                      | SASDTS5 | SASDTT5 |
| <b>Software</b>                           |               |         |                                              |         |         |
| ATSAS Software Version <sup>8</sup>       |               |         | 3.0.5                                        |         |         |
| Primary data reduction                    |               |         | CHROMIXS <sup>9</sup> / PRIMUS <sup>10</sup> |         |         |
| Data processing                           |               |         | GNOM <sup>11</sup>                           |         |         |
| <i>Rigid body</i> modelling               |               |         | CORAL <sup>12</sup>                          |         |         |
| Flexibility ensemble modelling            |               |         | EOM <sup>13,14</sup>                         |         |         |
| Structure validation                      |               |         | CRY SOL <sup>15</sup>                        |         |         |
| Statistic goodness-of-fit test            |               |         | $\chi^2$ , CorMap <sup>16</sup>              |         |         |
| Model visualization                       |               |         | PyMOL <sup>17</sup>                          |         |         |

‡s = 4πsin(θ)/λ, 2θ – scattering angle, n.d. not determined



**Supplementary Table 3. PCR Primers**

| <b>Internal number</b> | <b>Name</b>                         | <b>Sequence (5' -3')</b>                                                                                                  |
|------------------------|-------------------------------------|---------------------------------------------------------------------------------------------------------------------------|
| <b>C-4130</b>          | Flag-BR_CRIB-TEV<br>Hin             | TAGAAATAATTTTGTTTAACTTTAAGAAGGAGATATACATATGGATTACA<br>AAGACGATGACGATAAGGATTACAAAGACGATGACGATAAGTCTGAAA<br>AAAGACGAGATGCTC |
| <b>C-4131</b>          | Flag-BR_CRIB-TEV<br>Her             | CTCAATGGTGTATGGTGTATGATGGTGGTGTATGGTGCTCGAGTCTTGA<br>AAATACAAGTTTTCTGCTTGCCTTCGGAGTTCAT                                   |
| <b>C-4214</b>          | CPn0677_co 67-<br>382 in pSL4 hin   | AAATAATTTTGTTTAACTTTAAGAAGGAGATATACATATGGGTAAGAAA<br>AGCCCGGATAG                                                          |
| <b>C-4215</b>          | CPn0677_co 67-<br>382 in pSL4 her   | CCGGATCTCAATGGTGTATGGTGTATGATGGTGGTGTATGGTGTTTGAAC<br>AGATCACCAATCAG                                                      |
| <b>C-4364</b>          | SNX9_SH3 in pSL4<br>hin             | AAATAATTTTGTTTAACTTTAAGAAGGAGATATACATATGGCCACCAAG<br>GCTCGGGT                                                             |
| <b>C-4365</b>          | SNX9_SH3 in pSL4<br>her             | GATGATGGTGGTGTATGGTGTCTCGAGTGC GGCCGCAAGCTTACCAGTT<br>GCTGGTCTTTGGTA                                                      |
| <b>C-4428</b>          | P1 Dead her                         | CGTGGGTCGCCGACGCTTCGCGTTTCGCGCCACCGGTGGTTCGCAAC<br>CGCAACAGCCGCAACGGTCGCAACAATGGTCGCGCCGCTCGGGCTT<br>TGCATC               |
| <b>C-4429</b>          | P2 Dead hin                         | CGGTGGCGCGAACGCGAAGCGTCCGGCGACCCACGGTAAGGGTGT<br>GCGGCGCAGGTTGCGACCGCGGGTAGCAGCAG                                         |
| <b>C-4430</b>          | 677co in pSL4 hin                   | AAATAATTTTGTTTAACTTTAAGAAGGAGATATACATATGGGTATCAAC<br>CCGAGCGGCA                                                           |
| <b>C-4483</b>          | pSL4 CRIB short<br>For              | TCCAGAAATCACAACAAACAGGTTTTATAGTTCACAAGTCGCAGATATT<br>GGAACACCAAGTA                                                        |
| <b>C-4484</b>          | pSL4 CRIB short<br>Rev              | GTCCAATGTGCTGGAAATTACTTGGTGTTC AATATCTGCGACTTGTG<br>AACTATAAAACCTG                                                        |
| <b>C-4489</b>          | pKM431/436 sirGFP<br>hin            | CCTCTAGAAATAATTTTGTTTAACTTTAAGAAGGAGATATATGTCTGAA<br>AAAAGACGAGATGC                                                       |
| <b>C-4490</b>          | pKM431/436 sirGFP<br>her            | GCACCACCCCGGTGAACAGCTCCTCGCCCTTGCTCACCATTGAACTA<br>CCACTTGATCCCTCGAGTGCGGCCGCAAGCT                                        |
| <b>C-4581</b>          | SH3 in pDS94 hin                    | CTAGAAATAATTTTGTTTAACTTTAAGAAGGAGATATACCATGGCCACC<br>AAGGCTCGGGT                                                          |
| <b>C-4582</b>          | SH3 in pDS94 her                    | ACCCCGGTGAACAGCTCCTCGCCCTTGCTCACCATTGAACTACCACTT<br>GATCCAAGCTTACCAGTTGCTGGTCC                                            |
| <b>C-4565</b>          | pFK31_BR-Crib<br>siGFP in pDS94 rvs | GCACCACCCCGGTGAACAGCTCCTCGCCCTTGCTCACCATTGAACTA<br>CCACTTGATCCTGCTTGCCTTCGGAGTTC                                          |

#### Supplementary Table 4. Plasmids

| Name  | Reference                                                                                                                                                                                                                                                                                        |
|-------|--------------------------------------------------------------------------------------------------------------------------------------------------------------------------------------------------------------------------------------------------------------------------------------------------|
| pSL4  | Luczak S. Dissertation <sup>18</sup>                                                                                                                                                                                                                                                             |
| pDS94 | This plasmid is based on: pET His6 GFP TEV LIC cloning vector (1GFP), gifted from Scott Gradia (Addgene plasmid # 29663; <a href="http://n2t.net/addgene:29663">http://n2t.net/addgene:29663</a> ; RRID:Addgene_29663) and was equipped with a 10x C-terminal His-tag and a CEN/ARS/TRP cassette |

## Supplementary References

- 1 Blanchet, C. E. *et al.* Versatile sample environments and automation for biological solution X-ray scattering experiments at the P12 beamline (PETRA III, DESY). *J Appl Crystallogr* **48**, 431-443 (2015).
- 2 Jantos, C. A., Heck, S., Roggendorf, R., Sen-Gupta, M. & Hegemann, J. H. Antigenic and molecular analyses of different Chlamydia pneumoniae strains. *J. Clin. Microbiol.* **35**, 620-623 (1997).
- 3 Porod, G. Die Röntgenkleinwinkelstreuung Von Dichtgepackten Kolloiden Systemen - 1 Teil. *Kolloid-Zeitschrift and Zeitschrift Fur Polymere* **124**, 83-114 (1951).
- 4 Fischer, H., de Oliveira Neto, M., Napolitano, H. B., Polikarpov, I. & Craievich, A. F. Determination of the molecular weight of proteins in solution from a single small-angle X-ray scattering measurement on a relative scale. *Journal of Applied Crystallography* **43**, 101-109 (2010).
- 5 Rambo, R. P. & Tainer, J. A. Accurate assessment of mass, models and resolution by small-angle scattering. *Nature* **496**, 477-481 (2013).
- 6 Hajizadeh, N. R., Franke, D., Jeffries, C. M. & Svergun, D. I. Consensus Bayesian assessment of protein molecular mass from solution X-ray scattering data. *Scientific Reports* **8**, 7204 (2018).
- 7 Kikhney, A. G., Borges, C. R., Molodenskiy, D. S., Jeffries, C. M. & Svergun, D. I. SASBDB: Towards an automatically curated and validated repository for biological scattering data. *Protein Sci* **29**, 66-75 (2020).
- 8 Manalastas-Cantos, K. *et al.* ATSAS 3.0: expanded functionality and new tools for small-angle scattering data analysis. *J Appl Crystallogr* **54**, 343-355 (2021).
- 9 Panjkovich, A. & Svergun, D. I. CHROMIXS: automatic and interactive analysis of chromatography-coupled small angle X-ray scattering data. *Bioinformatics* (2017).
- 10 Konarev, P. V., Volkov, V. V., Sokolova, A. V., Koch, M. H. J. & Svergun, D. I. PRIMUS: a Windows PC-based system for small-angle scattering data analysis. *Journal of Applied Crystallography* **36**, 1277-1282 (2003).
- 11 Svergun, D. I. Determination of the Regularization Parameter in Indirect-Transform Methods Using Perceptual Criteria. *Journal of Applied Crystallography* **25**, 495-503 (1992).
- 12 Petoukhov, M. V. *et al.* New developments in the ATSAS program package for small-angle scattering data analysis. *J Appl Crystallogr* **45**, 342-350 (2012).
- 13 Bernado, P., Mylonas, E., Petoukhov, M. V., Blackledge, M. & Svergun, D. I. Structural characterization of flexible proteins using small-angle X-ray scattering. *J Am Chem Soc* **129**, 5656-5664 (2007).
- 14 Tria, G., Mertens, H. D., Kachala, M. & Svergun, D. I. Advanced ensemble modelling of flexible macromolecules using X-ray solution scattering. *IUCrJ* **2**, 207-217 (2015).
- 15 Svergun, D., Barberato, C. & Koch, M. H. J. CRY SOL – a Program to Evaluate X-ray Solution Scattering of Biological Macromolecules from Atomic Coordinates. *Journal of Applied Crystallography* **28**, 768-773 (1995).
- 16 Franke, D., Jeffries, C. M. & Svergun, D. I. Correlation Map, a goodness-of-fit test for one-dimensional X-ray scattering spectra. *Nat Methods* **12**, 419-422 (2015).
- 17 PyMOL. The PyMOL Molecular Graphics System, Version 2.0 Schrödinger, LLC. (2015).
- 18 Luczak, S. *Biochemical and Biophysical Characterization of the Adhesin and Invasin Pmp21 from Chlamydia pneumoniae* PhD thesis, Heinrich Heine University, Düsseldorf, (2017).

# Uncropped Scans of gels and blots

Uncropped gel to Supplementary Figure 1a

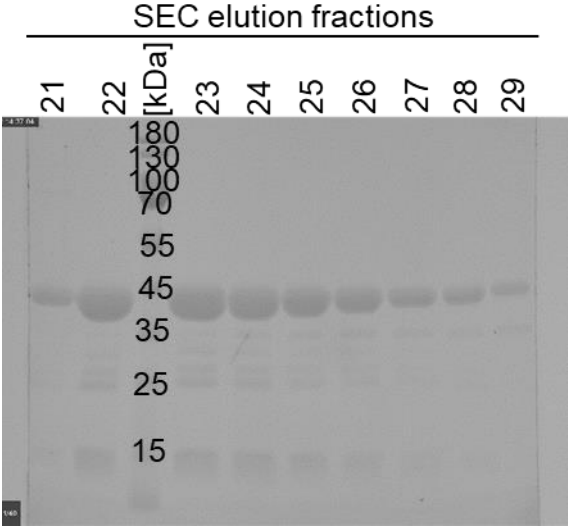

Uncropped gel to Supplementary Figure 2a

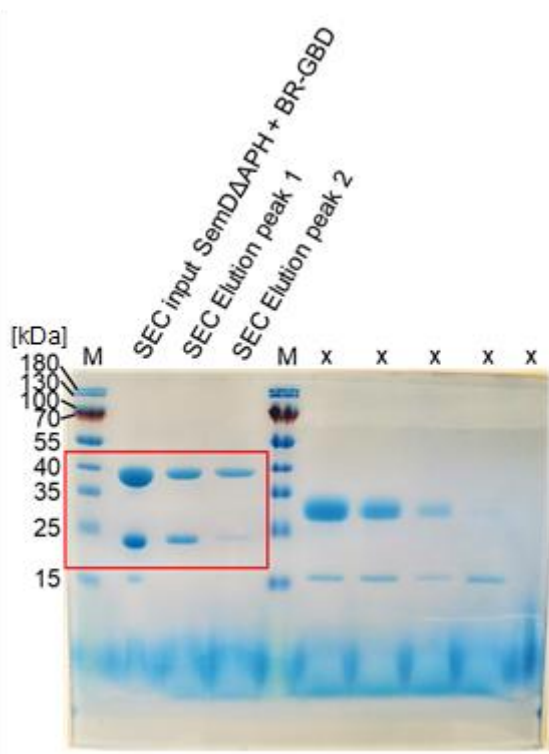

Uncropped gel to Supplementary Figure 5

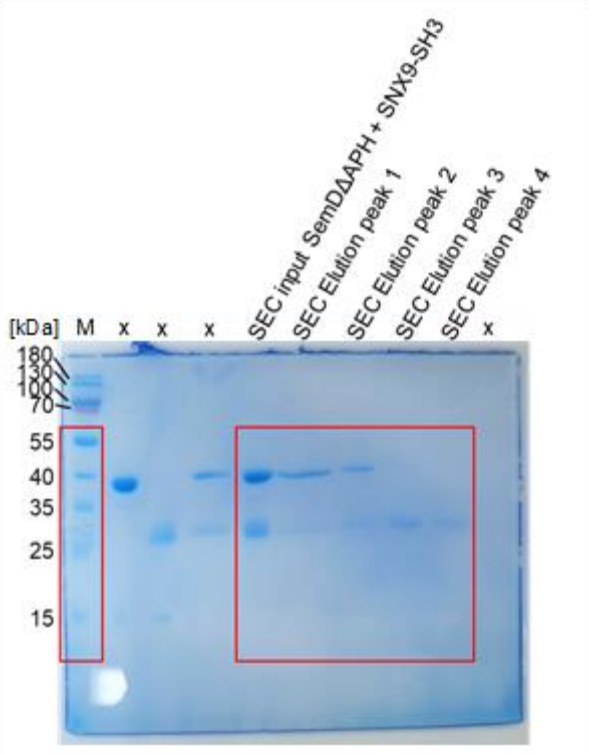

Supplement: 41467_2024_51681_MOESM1_ESM.pdf [file 41467_2024_51681_MOESM1_ESM.pdf]
